# Supplementary material
Source: PubMed Central journal article supplement (PMC3227512)
Supplement: NIHMS289957-supplement-1.pdf [file NIHMS289957-supplement-1.pdf]

| Phylogenetic group                                                                 | Mo(0) | Mo(28) | Mo(56) | Mo(84) | Mo(112) | Mo(140) | Wk(0) | Wk(28) | Wk(56) | Wk(84) | Wk(112) | Wk(140) | Fd(0) | Fd(140) |
|------------------------------------------------------------------------------------|-------|--------|--------|--------|---------|---------|-------|--------|--------|--------|---------|---------|-------|---------|
| Bacilli-Bacillales-Paenibacillaceae-unclassified                                   | 0.20  | -      | -      | -      | -       | -       | 0.09  | -      | -      | -      | -       | -       | -     | 0.02    |
| Bacilli-Bacillales-Paenibacillaceae- <i>Cohnella</i>                               | 0.16  | 0.09   | -      | -      | -       | -       | 0.06  | 0.03   | -      | 0.01   | 0.03    | -       | 0.01  | 0.01    |
| Bacilli-Bacillales-Paenibacillaceae- <i>Brevibacillus</i>                          | -     | -      | -      | -      | -       | -       | -     | -      | -      | -      | -       | -       | 0.01  | 0.02    |
| Bacilli-Bacillales-Paenibacillaceae- <i>Paenibacillus</i>                          | -     | 0.02   | -      | 0.04   | -       | -       | -     | -      | -      | -      | -       | -       | 0.02  | 0.03    |
| Bacilli-Bacillales-Baciliaceae-unclassified                                        | -     | 0.02   | -      | -      | 0.02    | -       | 0.02  | -      | -      | -      | -       | -       | -     | 0.01    |
| Bacilli-Bacillales-Baciliaceae- <i>Bacillus</i>                                    | 0.02  | 0.02   | -      | 0.02   | -       | -       | 0.01  | -      | -      | -      | -       | 0.01    | 0.11  | 0.11    |
| Bacilli-Bacillales-Thermoactinomycetaceae- <i>Laceyella</i>                        | -     | -      | -      | -      | -       | -       | -     | -      | -      | -      | -       | -       | -     | 0.01    |
| Bacilli-Bacillales-Thermoactinomycetaceae- <i>Shimazuella</i>                      | -     | 0.02   | -      | -      | -       | -       | 0.01  | -      | -      | -      | -       | 0.01    | 0.01  | -       |
| Bacilli-Bacillales-Thermoactinomycetaceae- <i>Thermoactinomyces</i>                | -     | -      | -      | -      | -       | -       | -     | -      | -      | -      | -       | -       | -     | 0.01    |
| Bacilli-Bacillales-Planococcaceae- <i>Paenisporosarcina</i>                        | -     | -      | -      | -      | -       | -       | -     | -      | -      | -      | -       | -       | 0.02  | -       |
| Bacilli-Bacillales-Planococcaceae- <i>Sporosarcina</i>                             | -     | -      | -      | -      | -       | -       | -     | -      | -      | -      | -       | -       | 0.01  | -       |
| Clostridia-unclassified                                                            | -     | 0.02   | -      | 0.02   | -       | -       | -     | -      | -      | 0.01   | -       | -       | 0.07  | 0.04    |
| Clostridia-Clostridiales-unclassified                                              | -     | -      | -      | -      | 0.05    | 0.02    | 0.02  | 0.01   | -      | 0.02   | -       | -       | 0.09  | 0.17    |
| Clostridia-Clostridiales-Syntrophomonadaceae-unclassified                          | -     | -      | -      | -      | -       | -       | -     | -      | -      | -      | -       | -       | -     | 0.01    |
| Clostridia-Clostridiales-Incertae Sedis XVIII- <i>Symbiobacterium</i>              | 0.02  | -      | -      | -      | -       | -       | -     | -      | 0.01   | -      | -       | -       | 0.01  | -       |
| Clostridia-Clostridiales-Peptococcaceae-Peptococcaceae 1- <i>Desulfosporosinus</i> | -     | -      | 0.03   | -      | -       | -       | -     | -      | -      | -      | -       | -       | 0.02  | 0.05    |
| Clostridia-Clostridiales-Peptococcaceae-Peptococcaceae 2- <i>Pelotomaculum</i>     | -     | -      | -      | -      | 0.05    | -       | -     | 0.01   | -      | -      | -       | -       | 0.01  | -       |
| Clostridia-Clostridiales-Peptococcaceae-Peptococcaceae 2- <i>Cryptanaerobacter</i> | -     | -      | -      | -      | -       | -       | -     | -      | -      | -      | -       | -       | -     | 0.01    |
| Clostridia-Clostridiales-Peptococcaceae-Peptococcaceae 2- <i>Thermincola</i>       | -     | -      | -      | -      | -       | -       | -     | -      | -      | -      | -       | -       | 0.01  | -       |
| Clostridia-Clostridiales-Ruminococcaceae-unclassified                              | -     | -      | -      | -      | -       | -       | -     | -      | -      | -      | 0.01    | -       | 0.01  | 0.01    |
| Clostridia-Clostridiales-Ruminococcaceae- <i>Acetivibrio</i>                       | 0.02  | -      | -      | -      | -       | -       | -     | 0.02   | -      | 0.01   | -       | -       | 0.01  | 0.12    |
| Clostridia-Clostridiales-Ruminococcaceae- <i>Sporobacter</i>                       | -     | -      | -      | -      | -       | -       | -     | -      | -      | -      | -       | -       | 0.01  | -       |
| Clostridia-Clostridiales-Lachnospiraceae-unclassified                              | -     | -      | -      | -      | -       | -       | -     | -      | -      | -      | -       | -       | 0.01  | -       |
| Clostridia-Clostridiales-Veillonellaceae-unclassified                              | -     | -      | -      | -      | -       | -       | -     | -      | -      | -      | -       | -       | 0.05  | 0.02    |
| Clostridia-Clostridiales-Veillonellaceae- <i>Sporotalea</i>                        | -     | -      | -      | -      | -       | -       | -     | -      | -      | -      | -       | -       | -     | 0.01    |
| Clostridia-Clostridiales-Veillonellaceae- <i>Sporomusa</i>                         | -     | -      | -      | -      | -       | -       | -     | -      | -      | -      | -       | -       | 0.03  | -       |
| Clostridia-Clostridiales-Clostridiaceae-unclassified                               | -     | -      | -      | -      | -       | -       | -     | -      | -      | -      | -       | -       | 0.01  | -       |
| Clostridia-Clostridiales-Clostridiaceae-Clostridiaceae 1-unclassified              | -     | -      | -      | 0.04   | -       | -       | -     | -      | -      | -      | -       | -       | 0.02  | -       |
| Clostridia-Clostridiales-Clostridiaceae-Clostridiaceae 1- <i>Clostridium</i>       | -     | -      | -      | 0.04   | -       | -       | -     | -      | -      | -      | -       | -       | -     | 0.05    |
| Clostridia-Clostridiales-Clostridiaceae-Clostridiaceae 1- <i>Oxybacter</i>         | -     | -      | -      | -      | -       | -       | -     | -      | -      | -      | -       | 0.01    | -     | -       |
| Clostridia-Clostridiales-Gracilibacteraceae- <i>Gracilibacter</i>                  | -     | 0.02   | -      | -      | -       | -       | -     | -      | -      | -      | -       | -       | 0.04  | 0.01    |
| Clostridia-Thermoanaerobacterales-Thermoanaerobacteraceae- <i>Mahella</i>          | -     | -      | -      | -      | -       | -       | -     | -      | -      | -      | -       | 0.01    | 0.03  | -       |
| Clostridia-Thermoanaerobacterales-Thermoanaerobacteraceae- <i>Moorella</i>         | -     | -      | -      | -      | -       | -       | -     | -      | -      | -      | -       | -       | 0.02  | -       |
| TM7-TM7_genera_incertae_sedis                                                      | -     | -      | -      | -      | -       | -       | -     | -      | -      | -      | -       | -       | -     | 0.01    |
| Bacteroidetes-                                                                     |       |        |        |        |         |         |       |        |        |        |         |         |       |         |
| unclassified                                                                       | 8.66  | 17.47  | 9.74   | 9.28   | 15.84   | 4.67    | 4.49  | 3.81   | 1.29   | 1.50   | 3.26    | 1.26    | 0.01  | 0.03    |
| Sphingobacteria-Sphingobacteriales-unclassified                                    | 0.40  | 0.31   | 0.07   | 0.02   | 0.45    | 0.22    | 0.10  | 0.23   | 0.07   | 0.07   | 0.09    | 0.05    | -     | -       |
| Sphingobacteria-Sphingobacteriales-Chitinophagaceae-unclassified                   | 2.99  | 2.17   | 2.50   | 2.25   | 1.98    | 1.00    | 2.65  | 1.24   | 0.85   | 0.68   | 0.48    | 0.16    | 0.01  | -       |
| Sphingobacteria-Sphingobacteriales-Chitinophagaceae- <i>Sediminibacterium</i>      | 0.33  | 0.03   | 0.04   | 0.33   | 4.41    | 12.53   | 0.36  | 1.77   | 2.16   | 1.60   | 1.05    | 0.54    | -     | -       |
| Sphingobacteria-Sphingobacteriales-Chitinophagaceae- <i>Flavisolibacter</i>        | 0.20  | 0.09   | 0.05   | 0.07   | 0.02    | -       | 0.10  | 0.03   | 0.02   | 0.03   | 0.01    | -       | -     | -       |
| Sphingobacteria-Sphingobacteriales-Chitinophagaceae- <i>Niastella</i>              | 0.02  | -      | -      | -      | -       | -       | 0.03  | -      | -      | -      | -       | -       | -     | -       |
| Sphingobacteria-Sphingobacteriales-Chitinophagaceae- <i>Terrimonas</i>             | 7.22  | 2.93   | 2.45   | 1.32   | 0.37    | 0.09    | 7.12  | 0.94   | 0.28   | 0.14   | 0.15    | 0.20    | -     | -       |
| Sphingobacteria-Sphingobacteriales-Cytophagaceae- <i>Dyadobacter</i>               | 0.07  | 0.09   | 0.12   | 0.26   | 0.07    | 0.04    | 0.02  | 0.01   | 0.01   | -      | -       | 0.01    | 0.55  | 0.22    |
| Sphingobacteria-Sphingobacteriales-Sphingobacteriaceae- <i>Olivibacter</i>         | -     | -      | -      | -      | -       | -       | -     | -      | -      | -      | -       | -       | 0.01  | 0.02    |
| Sphingobacteria-Sphingobacteriales-Sphingobacteriaceae- <i>Pedobacter</i>          | -     | -      | -      | -      | -       | -       | -     | -      | -      | -      | -       | -       | -     | 0.12    |
| Sphingobacteria-Sphingobacteriales-Sphingobacteriaceae- <i>Muciliaginibacter</i>   | -     | -      | -      | -      | -       | -       | -     | -      | -      | -      | 0.02    | -       | -     | -       |
| Flavobacteria-Flavobacteriales-unclassified                                        | 0.02  | 0.02   | -      | 0.04   | -       | -       | 0.01  | -      | -      | 0.01   | -       | -       | -     | -       |
| Flavobacteria-Flavobacteriales-Flavobacteriaceae-unclassified                      | 0.24  | 0.06   | 0.17   | 0.28   | 0.05    | 0.02    | 0.36  | -      | 0.01   | 0.02   | -       | 0.01    | -     | 0.01    |
| Flavobacteria-Flavobacteriales-Flavobacteriaceae- <i>Flavobacterium</i>            | 0.84  | 0.06   | 0.03   | 0.15   | -       | -       | 0.38  | 0.02   | -      | -      | -       | -       | -     | 0.12    |
| Flavobacteria-Flavobacteriales-Flavobacteriaceae- <i>Chryseobacterium</i>          | 0.82  | 0.20   | 0.29   | 0.47   | 0.02    | -       | 0.57  | 0.04   | -      | -      | -       | -       | -     | 0.01    |
| Proteobacteria-                                                                    |       |        |        |        |         |         |       |        |        |        |         |         |       |         |
| unclassified                                                                       | 5.03  | 5.60   | 4.77   | 4.86   | 7.85    | 4.59    | 5.30  | 4.64   | 3.25   | 3.73   | 3.50    | 3.68    | 2.02  | 1.59    |

| Phylogenetic group                                                                      | Mo(0) | Mo(28) | Mo(56) | Mo(84) | Mo(112) | Mo(140) | Wk(0) | Wk(28) | Wk(56) | Wk(84) | Wk(112) | Wk(140) | Fd(0) | Fd(140) |
|-----------------------------------------------------------------------------------------|-------|--------|--------|--------|---------|---------|-------|--------|--------|--------|---------|---------|-------|---------|
| Epsilonproteobacteria-Campylobacteriales-Helicobacteraceae-unclassified                 | -     | 0.02   | -      | -      | -       | -       | -     | -      | -      | -      | -       | -       | 0.01  | -       |
| Deltaproteobacteria-unclassified                                                        | 0.02  | 0.09   | 0.08   | 0.02   | -       | -       | -     | -      | 0.03   | -      | 0.05    | 0.01    | 0.07  | 0.05    |
| Deltaproteobacteria-Syntrophobacteriales-Syntrophaceae-unclassified                     | -     | -      | -      | -      | -       | -       | -     | -      | -      | -      | -       | -       | 0.01  | 0.01    |
| Deltaproteobacteria-Syntrophobacteriales-Syntrophaceae- <i>Desulfomonile</i>            | -     | -      | -      | -      | -       | -       | -     | -      | -      | -      | -       | -       | 0.01  | -       |
| Deltaproteobacteria-Bdellovibrionales-Bacteriovoraceae- <i>Peredibacter</i>             | -     | -      | -      | -      | -       | -       | 0.01  | -      | -      | -      | -       | -       | -     | -       |
| Deltaproteobacteria-Desulfuromonadales-Desulfuromonadaceae-unclassified                 | -     | -      | -      | -      | -       | -       | -     | -      | -      | -      | -       | -       | 0.01  | -       |
| Deltaproteobacteria-Desulfuromonadales-Geobacteraceae- <i>Geobacter</i>                 | -     | -      | -      | -      | -       | -       | -     | -      | -      | -      | -       | -       | -     | 0.01    |
| Deltaproteobacteria-Desulfobacteriales-Desulfobulbaceae-unclassified                    | -     | -      | -      | -      | -       | -       | -     | 0.01   | -      | -      | -       | -       | -     | 0.01    |
| Deltaproteobacteria-Myxococcales-unclassified                                           | -     | 0.02   | 0.09   | 0.09   | 0.02    | 0.11    | -     | -      | 0.01   | -      | 0.01    | 0.03    | 0.01  | 0.01    |
| Deltaproteobacteria-Myxococcales-Cystobacterineae-Cystobacteraceae-unclassified         | -     | -      | 0.01   | -      | -       | -       | -     | -      | -      | -      | -       | -       | -     | -       |
| Deltaproteobacteria-Myxococcales-Sorangineae-unclassified                               | -     | -      | -      | -      | -       | -       | 0.01  | -      | -      | -      | -       | -       | -     | 0.01    |
| Deltaproteobacteria-Myxococcales-Sorangineae-Polyangiaceae-unclassified                 | -     | -      | -      | -      | -       | -       | -     | -      | 0.03   | 0.02   | 0.01    | -       | -     | -       |
| Deltaproteobacteria-Myxococcales-Sorangineae-Polyangiaceae- <i>Byssovorax</i>           | -     | -      | -      | -      | -       | -       | -     | -      | 0.02   | -      | -       | -       | -     | 0.02    |
| Betaproteobacteria-unclassified                                                         | 4.36  | 2.82   | 2.14   | 1.95   | 1.56    | 2.19    | 4.56  | 2.21   | 1.98   | 2.04   | 2.47    | 1.87    | 1.00  | 0.72    |
| Betaproteobacteria-Nitrosomonadales-Nitrosomonadaceae-unclassified                      | 0.09  | 0.46   | 0.19   | 0.20   | 0.30    | 0.04    | 0.10  | 0.12   | -      | 0.01   | 0.05    | 0.04    | -     | -       |
| Betaproteobacteria-Nitrosomonadales-Nitrosomonadaceae- <i>Nitrosomonas</i>              | 0.02  | 0.20   | 0.04   | 0.06   | 0.12    | 0.04    | 0.02  | 0.04   | -      | 0.03   | -       | 0.01    | -     | -       |
| Betaproteobacteria-Nitrosomonadales-Nitrosomonadaceae- <i>Nitrospira</i>                | 0.16  | -      | -      | -      | 0.03    | 0.02    | 0.06  | 0.01   | -      | -      | -       | -       | -     | -       |
| Betaproteobacteria-Burkholderiales-unclassified                                         | 0.84  | 0.54   | 0.49   | 0.47   | 0.22    | 0.61    | 0.87  | 0.87   | 0.68   | 0.59   | 0.62    | 0.48    | 0.41  | 0.70    |
| Betaproteobacteria-Burkholderiales-Burkholderiales_incertae_sedis-unclassified          | 0.13  | 0.17   | 0.17   | 0.13   | 0.03    | 0.11    | 0.12  | 0.07   | 0.03   | 0.02   | 0.04    | 0.04    | 1.10  | 1.23    |
| Betaproteobacteria-Burkholderiales-Burkholderiales_incertae_sedis- <i>Methylibium</i>   | 0.31  | 0.19   | 0.40   | 0.60   | 0.03    | 0.26    | 0.18  | 0.06   | 0.07   | 0.06   | 0.01    | 0.02    | 0.02  | 0.03    |
| Betaproteobacteria-Burkholderiales-Burkholderiales_incertae_sedis- <i>Aquabacterium</i> | -     | -      | -      | -      | -       | -       | 0.01  | 0.01   | -      | -      | -       | -       | 0.01  | 0.07    |
| Betaproteobacteria-Burkholderiales-Burkholderiales_incertae_sedis- <i>Xylophilus</i>    | -     | -      | 0.03   | -      | -       | -       | -     | -      | -      | -      | -       | -       | -     | -       |
| Betaproteobacteria-Burkholderiales-Burkholderiaceae-unclassified                        | 0.04  | 0.02   | 0.01   | 0.04   | -       | -       | 0.03  | -      | 0.02   | -      | 0.02    | 0.01    | 0.16  | 0.01    |
| Betaproteobacteria-Burkholderiales-Burkholderiaceae- <i>Cupriavidus</i>                 | 0.13  | 0.05   | 0.04   | 0.11   | 0.13    | 0.04    | 0.15  | 0.07   | 0.01   | -      | 0.01    | -       | 1.35  | 1.14    |
| Betaproteobacteria-Burkholderiales-Burkholderiaceae- <i>Wautersia</i>                   | -     | -      | -      | -      | -       | -       | -     | -      | -      | 0.03   | -       | -       | -     | -       |
| Betaproteobacteria-Burkholderiales-Burkholderiaceae- <i>Ralstonia</i>                   | -     | -      | -      | -      | -       | 0.02    | -     | 0.04   | -      | 0.05   | 0.02    | -       | 0.29  | 0.18    |
| Betaproteobacteria-Burkholderiales-Burkholderiaceae- <i>Burkholderia</i>                | 0.04  | -      | -      | 0.02   | -       | -       | 0.03  | -      | 0.03   | 0.01   | 0.01    | -       | 0.55  | 0.36    |
| Betaproteobacteria-Burkholderiales-Alcaligenaceae-unclassified                          | 0.02  | -      | -      | 0.02   | -       | -       | 0.01  | -      | -      | -      | -       | 0.01    | 0.02  | 0.01    |
| Betaproteobacteria-Burkholderiales-Alcaligenaceae- <i>Pigmentiphaga</i>                 | 0.02  | 0.03   | 0.04   | 0.02   | -       | 0.02    | 0.06  | -      | -      | -      | -       | -       | 0.07  | 0.08    |
| Betaproteobacteria-Burkholderiales-Alcaligenaceae- <i>Achromobacter</i>                 | 0.04  | 0.05   | -      | -      | -       | -       | 0.07  | 0.01   | 0.01   | -      | -       | -       | 0.15  | 0.12    |
| Betaproteobacteria-Burkholderiales-Oxalobacteraceae-unclassified                        | 0.24  | 0.13   | 0.24   | 0.13   | 0.08    | 0.17    | 0.21  | 0.02   | 0.03   | 0.04   | 0.01    | -       | 0.33  | 0.30    |
| Betaproteobacteria-Burkholderiales-Oxalobacteraceae- <i>Hermiimonas</i>                 | 0.89  | 0.08   | 0.09   | 0.02   | -       | 0.04    | 0.80  | 0.14   | 0.03   | 0.07   | 0.02    | 0.02    | 2.94  | 1.90    |
| Betaproteobacteria-Burkholderiales-Oxalobacteraceae- <i>Massilia</i>                    | -     | 0.06   | -      | -      | -       | -       | -     | -      | -      | -      | -       | -       | 0.02  | -       |
| Betaproteobacteria-Burkholderiales-Oxalobacteraceae- <i>Janthinobacterium</i>           | -     | -      | -      | -      | -       | -       | 0.01  | -      | -      | -      | -       | -       | -     | -       |
| Betaproteobacteria-Burkholderiales-Oxalobacteraceae- <i>Naxibacter</i>                  | -     | -      | -      | -      | -       | -       | -     | -      | -      | -      | -       | -       | 0.01  | -       |
| Betaproteobacteria-Burkholderiales-Oxalobacteraceae- <i>Herbaspirillum</i>              | 0.04  | 0.02   | 0.03   | 0.02   | -       | -       | 0.01  | 0.02   | -      | -      | -       | -       | 0.21  | 0.11    |
| Betaproteobacteria-Burkholderiales-Comamonadaceae-unclassified                          | 1.66  | 2.44   | 3.05   | 2.49   | 1.50    | 1.99    | 2.73  | 2.48   | 2.48   | 2.89   | 2.45    | 2.38    | 0.92  | 1.51    |
| Betaproteobacteria-Burkholderiales-Comamonadaceae- <i>Simplicispira</i>                 | -     | 0.03   | -      | -      | -       | 0.02    | -     | -      | -      | 0.01   | -       | -       | -     | -       |
| Betaproteobacteria-Burkholderiales-Comamonadaceae- <i>Ranlibacter</i>                   | 0.07  | 0.02   | 0.01   | 0.02   | -       | 0.02    | 0.02  | -      | 0.02   | 0.01   | 0.02    | -       | -     | -       |
| Betaproteobacteria-Burkholderiales-Comamonadaceae- <i>Comamonas</i>                     | 0.20  | 0.20   | 0.20   | 0.09   | 0.17    | 0.22    | 0.15  | 0.35   | 0.40   | 0.26   | 0.13    | 0.15    | 8.31  | 9.46    |
| Betaproteobacteria-Burkholderiales-Comamonadaceae- <i>Caenimonas</i>                    | -     | 0.02   | -      | -      | -       | -       | 0.02  | -      | 0.01   | 0.03   | 0.01    | -       | -     | -       |
| Betaproteobacteria-Burkholderiales-Comamonadaceae- <i>Delftia</i>                       | 0.02  | -      | -      | -      | -       | -       | -     | -      | -      | -      | -       | -       | -     | 0.03    |
| Betaproteobacteria-Burkholderiales-Comamonadaceae- <i>Pseudorhodoferax</i>              | 0.22  | -      | -      | -      | -       | -       | 0.11  | -      | -      | -      | -       | -       | -     | -       |
| Betaproteobacteria-Burkholderiales-Comamonadaceae- <i>Curvibacter</i>                   | -     | -      | -      | -      | -       | -       | -     | -      | -      | -      | 0.01    | -       | -     | 0.01    |
| Betaproteobacteria-Burkholderiales-Comamonadaceae- <i>Diaphorobacter</i>                | 0.09  | 0.02   | 0.03   | 0.04   | -       | 0.02    | 0.05  | 0.05   | 0.01   | 0.04   | 0.05    | 0.03    | 1.02  | 1.37    |
| Betaproteobacteria-Burkholderiales-Comamonadaceae- <i>Ottovia</i>                       | -     | -      | -      | -      | -       | -       | -     | -      | -      | -      | 0.01    | -       | -     | -       |
| Betaproteobacteria-Burkholderiales-Comamonadaceae- <i>Acidovorax</i>                    | 5.56  | 12.30  | 19.85  | 15.93  | 3.51    | 24.97   | 5.38  | 17.35  | 22.08  | 19.18  | 16.48   | 14.36   | 10.39 | 9.55    |
| Betaproteobacteria-Burkholderiales-Comamonadaceae- <i>Rhodoferax</i>                    | 0.02  | -      | 0.01   | 0.02   | 0.02    | -       | 0.03  | -      | -      | -      | -       | -       | -     | -       |
| Betaproteobacteria-Burkholderiales-Comamonadaceae- <i>Hydrogenophaga</i>                | -     | -      | 0.03   | -      | -       | -       | -     | -      | -      | -      | -       | -       | 0.04  | 0.04    |
| Betaproteobacteria-Burkholderiales-Comamonadaceae- <i>Variovorax</i>                    | 0.42  | 0.20   | 0.13   | 0.15   | 0.02    | 0.11    | 0.20  | 0.07   | 0.09   | 0.05   | 0.01    | -       | 0.37  | 0.94    |
| Betaproteobacteria-Burkholderiales-Comamonadaceae- <i>Polaromonas</i>                   | 0.20  | 0.02   | 0.08   | -      | 0.08    | -       | 0.32  | 0.26   | 0.11   | 0.20   | 0.10    | 0.05    | -     | -       |
| Betaproteobacteria-Burkholderiales-Comamonadaceae- <i>Alicyclophilus</i>                | -     | -      | -      | 0.02   | -       | -       | 0.01  | -      | 0.01   | -      | -       | 0.01    | 0.01  | 0.02    |

| Phylogenetic group                                                           | Mo(0) | Mo(28) | Mo(56) | Mo(84) | Mo(112) | Mo(140) | Wk(0) | Wk(28) | Wk(56) | Wk(84) | Wk(112) | Wk(140) | Fd(0) | Fd(140) |
|------------------------------------------------------------------------------|-------|--------|--------|--------|---------|---------|-------|--------|--------|--------|---------|---------|-------|---------|
| Betaproteobacteria-Hydrogenophilales-Hydrogenophilaceae- <i>Thiobacillus</i> | 4.92  | 4.83   | 7.03   | 6.73   | 3.79    | 6.99    | 4.52  | 7.19   | 6.72   | 6.25   | 6.71    | 4.94    | 0.15  | 0.19    |
| Betaproteobacteria-Methylphilales-Methylphilaceae-unclassified               | 0.02  | 0.02   | -      | -      | -       | -       | -     | -      | -      | -      | -       | -       | -     | -       |
| Betaproteobacteria-Methylphilales-Methylphilaceae- <i>Methylorvorous</i>     | -     | -      | -      | -      | -       | -       | -     | 0.03   | -      | -      | -       | -       | 0.23  | 0.11    |
| Betaproteobacteria-Neisseriales-Neisseriaceae-unclassified                   | -     | -      | 0.01   | 0.04   | 0.02    | -       | 0.01  | 0.02   | 0.03   | 0.03   | 0.05    | -       | -     | -       |
| Betaproteobacteria-Neisseriales-Neisseriaceae- <i>Pseudogulbenkiana</i>      | -     | -      | -      | -      | -       | -       | -     | 0.01   | -      | 0.02   | -       | -       | 0.01  | -       |
| Betaproteobacteria-Neisseriales-Neisseriaceae- <i>Vogesella</i>              | -     | -      | -      | -      | -       | -       | -     | -      | -      | -      | -       | -       | 0.03  | -       |
| Betaproteobacteria-Rhodocyclales-Rhodocyclaceae-unclassified                 | -     | 0.02   | -      | -      | -       | -       | 0.03  | -      | -      | -      | -       | -       | -     | -       |
| Betaproteobacteria-Rhodocyclales-Rhodocyclaceae- <i>Shinella</i>             | -     | -      | -      | -      | -       | -       | 0.01  | 0.01   | 0.01   | -      | -       | -       | -     | -       |
| Betaproteobacteria-Rhodocyclales-Rhodocyclaceae- <i>Thaueria</i>             | -     | -      | -      | -      | -       | -       | -     | -      | -      | -      | -       | -       | 0.01  | -       |
| Betaproteobacteria-Rhodocyclales-Rhodocyclaceae- <i>Propionivibrio</i>       | -     | -      | -      | -      | -       | -       | -     | -      | -      | -      | -       | -       | -     | 0.01    |
| Betaproteobacteria-Rhodocyclales-Rhodocyclaceae- <i>Denitratisoma</i>        | -     | -      | -      | 0.02   | -       | -       | -     | -      | 0.01   | -      | -       | -       | -     | -       |
| Betaproteobacteria-Rhodocyclales-Rhodocyclaceae- <i>Azocarus</i>             | 0.02  | -      | -      | 0.04   | -       | 0.09    | -     | -      | -      | -      | -       | -       | 0.06  | 0.19    |
| Betaproteobacteria-Rhodocyclales-Rhodocyclaceae- <i>Azospira</i>             | -     | 0.02   | -      | -      | -       | -       | -     | -      | -      | -      | -       | -       | 0.03  | 0.03    |
| Alphaproteobacteria-unclassified                                             | 5.87  | 2.96   | 3.71   | 4.06   | 3.38    | 3.96    | 6.64  | 4.56   | 3.90   | 3.76   | 3.40    | 4.12    | 0.31  | 0.42    |
| Alphaproteobacteria-Rhizobiales-unclassified                                 | 4.03  | 3.01   | 2.45   | 2.73   | 1.15    | 2.62    | 4.30  | 2.76   | 2.52   | 2.37   | 2.10    | 2.58    | 0.30  | 0.39    |
| Alphaproteobacteria-Rhizobiales-Bradyrhizobiaceae-unclassified               | 5.69  | 2.09   | 1.54   | 1.21   | 0.52    | 0.76    | 4.75  | 1.25   | 0.43   | 0.46   | 0.41    | 0.52    | 1.64  | 2.12    |
| Alphaproteobacteria-Rhizobiales-Bradyrhizobiaceae- <i>Balneimonas</i>        | -     | -      | -      | -      | -       | -       | -     | -      | -      | -      | -       | -       | -     | 0.01    |
| Alphaproteobacteria-Rhizobiales-Bradyrhizobiaceae- <i>Rhodopseudomonas</i>   | -     | -      | -      | 0.06   | -       | -       | 0.01  | -      | -      | -      | -       | -       | -     | -       |
| Alphaproteobacteria-Rhizobiales-Bradyrhizobiaceae- <i>Bradyrhizobium</i>     | 0.33  | 0.20   | 0.28   | 0.41   | 0.15    | 0.37    | 0.30  | 0.32   | 0.16   | 0.11   | 0.10    | 0.05    | -     | 0.02    |
| Alphaproteobacteria-Rhizobiales-Bradyrhizobiaceae- <i>Afipia</i>             | -     | -      | -      | -      | -       | -       | 0.02  | 0.01   | -      | -      | -       | -       | -     | -       |
| Alphaproteobacteria-Rhizobiales-Bradyrhizobiaceae- <i>Nitrobacter</i>        | 0.20  | 0.22   | 0.09   | 0.13   | 0.07    | 0.06    | 0.13  | 0.09   | 0.04   | 0.04   | 0.03    | 0.08    | -     | -       |
| Alphaproteobacteria-Rhizobiales-Bradyrhizobiaceae- <i>Bosea</i>              | 0.07  | 0.11   | 0.08   | 0.15   | 0.07    | 0.02    | 0.06  | 0.12   | 0.12   | 0.09   | 0.08    | 0.09    | 0.01  | 0.03    |
| Alphaproteobacteria-Rhizobiales-Bradyrhizobiaceae- <i>Agromonas</i>          | 0.02  | -      | -      | -      | -       | 0.02    | 0.01  | 0.02   | 0.01   | -      | -       | 0.01    | 0.01  | -       |
| Alphaproteobacteria-Rhizobiales-Rhizobiaceae-unclassified                    | 0.04  | 0.02   | -      | -      | -       | -       | -     | 0.02   | -      | 0.01   | -       | 0.02    | -     | -       |
| Alphaproteobacteria-Rhizobiales-Rhizobiaceae- <i>Kaistia</i>                 | 0.33  | 0.22   | 0.05   | 0.07   | 0.05    | 0.06    | 0.26  | 0.02   | 0.02   | -      | -       | -       | -     | 0.12    |
| Alphaproteobacteria-Rhizobiales-Rhizobiaceae- <i>Rhizobium</i>               | 0.35  | 0.11   | 0.25   | 0.32   | 0.05    | 0.32    | 0.15  | 0.17   | 0.11   | 0.08   | 0.11    | 0.32    | 0.09  | 0.10    |
| Alphaproteobacteria-Rhizobiales-Methylocystaceae-unclassified                | -     | -      | 0.03   | -      | -       | -       | 0.01  | -      | -      | -      | 0.01    | -       | 0.07  | 0.17    |
| Alphaproteobacteria-Rhizobiales-Methylocystaceae- <i>Methylocystis</i>       | -     | -      | -      | -      | 0.02    | 0.02    | -     | -      | -      | -      | -       | -       | -     | -       |
| Alphaproteobacteria-Rhizobiales-Methylocystaceae- <i>Pleomorhomonas</i>      | -     | -      | -      | -      | -       | -       | -     | -      | -      | -      | -       | 0.01    | -     | -       |
| Alphaproteobacteria-Rhizobiales-Methylocystaceae- <i>Methylophila</i>        | -     | -      | -      | -      | -       | -       | 0.02  | -      | -      | -      | -       | -       | 0.02  | 0.18    |
| Alphaproteobacteria-Rhizobiales-Phyllobacteriaceae-unclassified              | 0.02  | -      | 0.04   | 0.17   | 0.15    | 0.13    | 0.01  | 0.07   | 0.03   | 0.01   | 0.01    | 0.01    | -     | 0.02    |
| Alphaproteobacteria-Rhizobiales-Phyllobacteriaceae- <i>Mesorhizobium</i>     | 0.18  | 0.25   | 0.25   | 0.32   | 0.27    | 0.24    | 0.11  | 0.30   | 0.25   | 0.28   | 0.12    | 0.15    | -     | 0.19    |
| Alphaproteobacteria-Rhizobiales-Rhodobiaceae-unclassified                    | -     | 0.02   | 0.04   | -      | -       | 0.02    | 0.01  | 0.01   | -      | 0.01   | -       | -       | -     | -       |
| Alphaproteobacteria-Rhizobiales-Rhodobiaceae- <i>Parvibaculum</i>            | 1.95  | 3.29   | 4.01   | 1.19   | 1.03    | 1.54    | 2.64  | 0.42   | 0.07   | 0.04   | -       | 0.02    | -     | 0.03    |
| Alphaproteobacteria-Rhizobiales-Brucellaceae- <i>Mycoplana</i>               | 0.02  | 0.02   | -      | 0.02   | -       | -       | 0.03  | 0.06   | 0.03   | 0.04   | -       | 0.04    | -     | -       |
| Alphaproteobacteria-Rhizobiales-Xanthobacteraceae-unclassified               | -     | 0.02   | -      | -      | -       | -       | -     | -      | -      | -      | -       | -       | -     | -       |
| Alphaproteobacteria-Rhizobiales-Xanthobacteraceae- <i>Ancylobacter</i>       | -     | 0.02   | -      | -      | -       | -       | 0.07  | -      | -      | -      | -       | -       | -     | 0.01    |
| Alphaproteobacteria-Rhizobiales-Xanthobacteraceae- <i>Xanthobacter</i>       | -     | -      | -      | -      | -       | -       | -     | 0.02   | -      | -      | -       | -       | -     | -       |
| Alphaproteobacteria-Rhizobiales-Xanthobacteraceae- <i>Pseudolabrys</i>       | 0.07  | 0.02   | 0.04   | 0.02   | -       | -       | 0.07  | 0.01   | -      | -      | -       | -       | -     | -       |
| Alphaproteobacteria-Rhizobiales-Xanthobacteraceae- <i>Starkeya</i>           | 0.02  | -      | -      | -      | -       | -       | 0.01  | -      | -      | -      | -       | -       | 0.01  | 0.01    |
| Alphaproteobacteria-Rhizobiales-Hyphomicrobiaceae-unclassified               | 0.60  | 0.33   | 0.20   | 0.37   | 0.17    | 0.28    | 0.48  | 0.50   | 0.25   | 0.36   | 0.31    | 0.55    | -     | 0.02    |
| Alphaproteobacteria-Rhizobiales-Hyphomicrobiaceae- <i>Angulomicrobium</i>    | -     | -      | -      | -      | 0.03    | -       | -     | -      | -      | -      | -       | -       | -     | -       |
| Alphaproteobacteria-Rhizobiales-Hyphomicrobiaceae- <i>Prosthecomicrobium</i> | -     | -      | -      | 0.02   | -       | -       | -     | -      | -      | -      | -       | -       | 0.01  | -       |
| Alphaproteobacteria-Rhizobiales-Hyphomicrobiaceae- <i>Devosia</i>            | 0.66  | 0.13   | -      | 0.07   | -       | -       | 0.62  | 0.16   | 0.05   | 0.03   | 0.04    | 0.05    | -     | -       |
| Alphaproteobacteria-Rhizobiales-Hyphomicrobiaceae- <i>Blastochloris</i>      | 0.02  | -      | -      | -      | -       | -       | -     | 0.02   | 0.01   | 0.03   | 0.01    | 0.02    | -     | -       |
| Alphaproteobacteria-Rhizobiales-Hyphomicrobiaceae- <i>Pedomicrobium</i>      | -     | -      | -      | -      | -       | -       | -     | -      | 0.01   | -      | -       | -       | -     | -       |
| Alphaproteobacteria-Rhizobiales-Hyphomicrobiaceae- <i>Hyphomicrobium</i>     | 0.11  | 0.08   | 0.08   | 0.07   | -       | 0.04    | 0.19  | 0.08   | 0.11   | 0.17   | 0.03    | 0.11    | 0.01  | 0.01    |
| Alphaproteobacteria-Rhizobiales-Hyphomicrobiaceae- <i>Rhodoplanes</i>        | 0.07  | 0.03   | 0.01   | 0.04   | 0.08    | 0.13    | 0.10  | 0.14   | 0.06   | 0.08   | 0.04    | 0.06    | -     | 0.01    |
| Alphaproteobacteria-Rhizobiales-Methylbacteriaceae- <i>Methylbacterium</i>   | -     | -      | -      | -      | -       | -       | 0.01  | -      | -      | -      | -       | 0.01    | -     | -       |
| Alphaproteobacteria-Caulobacterales-unclassified                             | -     | -      | -      | -      | -       | -       | 0.03  | 0.02   | 0.01   | -      | -       | -       | 0.01  | -       |
| Alphaproteobacteria-Caulobacterales-Caulobacteraceae-unclassified            | 0.20  | 0.25   | 0.20   | 0.15   | 0.02    | 0.06    | 0.20  | 0.37   | 0.41   | 0.49   | 0.28    | 0.46    | -     | 0.01    |
| Alphaproteobacteria-Caulobacterales-Caulobacteraceae- <i>Caulobacter</i>     | 0.84  | 0.60   | 0.82   | 0.24   | 0.18    | 0.32    | 1.84  | 0.36   | 0.10   | 0.05   | 0.02    | 0.01    | 0.01  | -       |

| Phylogenetic group                                                                        | Mo(0) | Mo(28) | Mo(56) | Mo(84) | Mo(112) | Mo(140) | Wk(0) | Wk(28) | Wk(56) | Wk(84) | Wk(112) | Wk(140) | Fd(0) | Fd(140) |
|-------------------------------------------------------------------------------------------|-------|--------|--------|--------|---------|---------|-------|--------|--------|--------|---------|---------|-------|---------|
| Alphaproteobacteria-Caulobacterales-Caulobacteraceae- <i>Brevundimonas</i>                | 3.52  | 0.60   | 1.76   | 1.10   | 0.40    | 0.43    | 4.02  | 7.02   | 10.90  | 12.08  | 5.39    | 7.56    | -     | 0.01    |
| Alphaproteobacteria-Caulobacterales-Caulobacteraceae- <i>Phenylobacterium</i>             | 1.82  | 1.12   | 0.61   | 0.58   | 0.33    | 1.04    | 2.83  | 2.44   | 1.69   | 1.63   | 1.31    | 1.46    | 0.05  | 0.05    |
| Alphaproteobacteria-Rhodospirillales-unclassified                                         | -     | -      | -      | -      | -       | -       | -     | -      | -      | -      | -       | -       | 0.01  | 0.01    |
| Alphaproteobacteria-Rhodospirillales-Rhodospirillaceae-unclassified                       | -     | -      | -      | -      | -       | -       | -     | -      | -      | -      | -       | -       | 0.01  | -       |
| Alphaproteobacteria-Rhodospirillales-Rhodospirillaceae- <i>Skermanella</i>                | 0.11  | -      | 0.01   | -      | -       | -       | 0.04  | 0.01   | 0.01   | -      | -       | -       | 0.20  | 0.08    |
| Alphaproteobacteria-Rhodospirillales-Acetobacteraceae-unclassified                        | 0.04  | 0.03   | 0.04   | -      | 0.02    | 0.02    | 0.04  | 0.02   | -      | -      | -       | -       | -     | 0.03    |
| Alphaproteobacteria-Rhodospirillales-Acetobacteraceae- <i>Belnapia</i>                    | 0.18  | -      | -      | 0.02   | -       | 0.02    | 0.07  | -      | -      | 0.01   | -       | -       | 0.05  | 0.04    |
| Alphaproteobacteria-Rhodospirillales-Acetobacteraceae- <i>Roseomonas</i>                  | 0.24  | 0.03   | 0.01   | 0.02   | -       | -       | 0.06  | 0.02   | 0.02   | 0.01   | 0.01    | 0.01    | 0.23  | 0.38    |
| Alphaproteobacteria-Sphingomonadales-unclassified                                         | 0.38  | 0.41   | 0.45   | 0.63   | 0.18    | 0.93    | 0.55  | 0.39   | 0.42   | 0.60   | 0.53    | 0.53    | 1.61  | 4.05    |
| Alphaproteobacteria-Sphingomonadales-Sphingomonadaceae-unclassified                       | 3.28  | 3.26   | 4.50   | 5.97   | 1.76    | 5.19    | 3.53  | 3.36   | 3.11   | 3.19   | 3.64    | 4.43    | 6.36  | 4.91    |
| Alphaproteobacteria-Sphingomonadales-Sphingomonadaceae- <i>Sphingomonas</i>               | 0.60  | 1.07   | 3.35   | 5.38   | 2.53    | 4.28    | 1.12  | 1.40   | 1.67   | 1.33   | 2.10    | 2.56    | 0.24  | 0.30    |
| Alphaproteobacteria-Sphingomonadales-Sphingomonadaceae- <i>Sphingopyxis</i>               | 0.04  | -      | 0.03   | 0.04   | 0.05    | 0.13    | 0.01  | 0.01   | 0.02   | -      | -       | 0.01    | -     | -       |
| Alphaproteobacteria-Sphingomonadales-Sphingomonadaceae- <i>Novosphingobium</i>            | 0.38  | 0.22   | 0.50   | 0.86   | 0.07    | 0.26    | 0.29  | 0.26   | 0.27   | 0.46   | 0.86    | 0.46    | 0.65  | 0.50    |
| Alphaproteobacteria-Sphingomonadales-Sphingomonadaceae- <i>Sphingosinicella</i>           | 3.61  | 1.75   | 0.61   | 0.28   | 0.03    | 0.15    | 4.86  | 5.14   | 3.11   | 3.14   | 1.64    | 1.19    | -     | 0.01    |
| Alphaproteobacteria-Sphingomonadales-Sphingomonadaceae- <i>Sphingobium</i>                | 1.71  | 1.61   | 1.56   | 2.51   | 0.60    | 1.73    | 1.97  | 1.30   | 0.38   | 0.29   | 0.22    | 0.27    | 7.63  | 6.27    |
| Alphaproteobacteria-Sphingomonadales-Erythrobacteraceae-unclassified                      | 0.24  | 0.35   | 0.25   | 0.33   | 0.17    | 0.76    | 0.80  | 0.37   | 0.20   | 0.17   | 0.15    | 0.21    | 2.62  | 6.25    |
| Alphaproteobacteria-Sphingomonadales-Erythrobacteraceae- <i>Porphyrobacter</i>            | 0.04  | 0.02   | 0.05   | 0.02   | 0.03    | 0.04    | 0.11  | 0.02   | 0.04   | 0.03   | 0.01    | 0.04    | 0.02  | 0.07    |
| Alphaproteobacteria-Sphingomonadales-Erythrobacteraceae- <i>Altererythrobacter</i>        | -     | -      | -      | -      | -       | -       | 0.01  | -      | -      | -      | -       | -       | -     | -       |
| Alphaproteobacteria-Sphingomonadales-Erythrobacteraceae- <i>Erythrobacter</i>             | -     | -      | -      | -      | -       | -       | 0.01  | -      | -      | -      | -       | -       | -     | -       |
| Alphaproteobacteria-Rhodobacteriales-Rhodobacteraceae-unclassified                        | 0.33  | 0.27   | 0.36   | 0.22   | 0.07    | 0.26    | 0.27  | 0.22   | 0.13   | 0.06   | 0.10    | 0.04    | 0.07  | 0.19    |
| Alphaproteobacteria-Rhodobacteriales-Rhodobacteraceae- <i>Rhodobacter</i>                 | -     | -      | 0.04   | 0.02   | -       | -       | 0.01  | -      | -      | -      | -       | -       | 0.02  | -       |
| Alphaproteobacteria-Rhodobacteriales-Rhodobacteraceae- <i>Haematobacter</i>               | -     | -      | -      | -      | -       | -       | -     | 0.01   | -      | -      | -       | -       | 0.03  | 0.02    |
| Alphaproteobacteria-Rhodobacteriales-Rhodobacteraceae- <i>Rubellimicrobium</i>            | -     | -      | -      | -      | -       | -       | -     | -      | -      | -      | -       | 0.02    | -     | 0.01    |
| Gammaproteobacteria-unclassified                                                          | 6.82  | 15.26  | 8.12   | 6.14   | 34.13   | 7.73    | 6.15  | 12.62  | 11.05  | 8.86   | 9.12    | 8.55    | 0.42  | 0.46    |
| Gammaproteobacteria-Gammaproteobacteria_incertae_sedis- <i>Solimonas</i>                  | -     | -      | -      | -      | -       | 0.02    | 0.01  | -      | -      | 0.02   | -       | -       | -     | -       |
| Gammaproteobacteria-Pseudomonadales-unclassified                                          | 0.07  | 0.08   | 0.11   | -      | 0.02    | 0.02    | 0.05  | 0.06   | 0.09   | 0.02   | 0.07    | 0.04    | -     | 0.01    |
| Gammaproteobacteria-Pseudomonadales-Moraxellaceae- <i>Acintebacter</i>                    | -     | -      | -      | -      | -       | -       | -     | -      | -      | -      | -       | -       | -     | 0.01    |
| Gammaproteobacteria-Pseudomonadales-Pseudomonadaceae-unclassified                         | 0.04  | 0.02   | 0.01   | -      | -       | -       | -     | 0.09   | 0.01   | 0.01   | 0.02    | 0.02    | 0.15  | 0.20    |
| Gammaproteobacteria-Pseudomonadales-Pseudomonadaceae- <i>Cellvibrio</i>                   | -     | -      | -      | -      | -       | -       | 0.01  | 0.02   | 0.02   | -      | -       | 0.01    | -     | -       |
| Gammaproteobacteria-Pseudomonadales-Pseudomonadaceae- <i>Pseudomonas</i>                  | 0.18  | 0.08   | 0.09   | 0.06   | 0.13    | 0.22    | 0.07  | 0.46   | 0.28   | 0.08   | 0.06    | 0.04    | 5.51  | 5.89    |
| Gammaproteobacteria-Pseudomonadales-Pseudomonadaceae- <i>Azotobacter</i>                  | -     | -      | -      | -      | -       | -       | -     | 0.01   | -      | 0.02   | -       | -       | -     | -       |
| Gammaproteobacteria-Chromatiales-unclassified                                             | 0.07  | -      | -      | -      | 0.05    | -       | 0.03  | -      | -      | -      | 0.01    | -       | -     | -       |
| Gammaproteobacteria-Ectothiorhodospiraceae-unclassified                                   | -     | -      | -      | -      | 0.02    | 0.04    | 0.01  | 0.01   | -      | -      | -       | 0.02    | -     | -       |
| Gammaproteobacteria-Legionellales-Legionellaceae- <i>Legionella</i>                       | -     | -      | -      | -      | -       | -       | 0.02  | -      | -      | -      | -       | -       | -     | 0.01    |
| Gammaproteobacteria-Legionellales-Coxiellaceae- <i>Aquicella</i>                          | -     | -      | -      | -      | -       | -       | 0.03  | -      | -      | -      | -       | 0.02    | -     | -       |
| Gammaproteobacteria-Enterobacteriales-Enterobacteriaceae-unclassified                     | -     | -      | -      | -      | -       | -       | -     | -      | -      | -      | -       | -       | 0.01  | 0.02    |
| Gammaproteobacteria-Enterobacteriales-Enterobacteriaceae- <i>Enterobacter</i>             | -     | -      | -      | -      | -       | -       | -     | -      | -      | -      | -       | -       | 0.02  | 0.03    |
| Gammaproteobacteria-Xanthomonadales-unclassified                                          | -     | 0.05   | -      | -      | -       | -       | -     | -      | 0.01   | 0.01   | 0.01    | -       | 0.01  | 0.01    |
| Gammaproteobacteria-Xanthomonadales-Sinobacteraceae-unclassified                          | 0.02  | -      | 0.01   | -      | -       | -       | -     | 0.01   | 0.03   | -      | -       | -       | 0.17  | 0.18    |
| Gammaproteobacteria-Xanthomonadales-Sinobacteraceae- <i>Alkanibacter</i>                  | -     | -      | -      | -      | -       | -       | -     | -      | -      | -      | -       | -       | 0.03  | -       |
| Gammaproteobacteria-Xanthomonadales-Sinobacteraceae- <i>Steroidobacter</i>                | 0.24  | 0.16   | -      | 0.02   | 0.03    | -       | 0.32  | 0.09   | 0.03   | 0.06   | 0.02    | -       | 0.01  | -       |
| Gammaproteobacteria-Xanthomonadales-Sinobacteraceae- <i>Nevskia</i>                       | -     | -      | -      | -      | -       | -       | -     | -      | -      | -      | -       | -       | 0.01  | -       |
| Gammaproteobacteria-Xanthomonadales-Xanthomonadaceae-unclassified                         | 0.27  | 0.14   | 0.75   | 1.62   | 2.68    | 0.32    | 0.28  | 0.27   | 0.19   | 0.44   | 0.09    | 0.23    | 2.82  | 2.37    |
| Gammaproteobacteria-Xanthomonadales-Xanthomonadaceae- <i>Luteimonas</i>                   | 0.24  | 0.60   | 0.70   | 2.75   | 3.28    | 0.19    | 0.44  | 0.15   | 0.05   | 0.18   | 0.08    | 0.05    | -     | -       |
| Gammaproteobacteria-Xanthomonadales-Xanthomonadaceae- <i>Rhodanobacter</i>                | 0.02  | -      | -      | -      | -       | -       | 0.01  | -      | -      | -      | -       | 0.10    | -     | -       |
| Gammaproteobacteria-Xanthomonadales-Xanthomonadaceae- <i>Lysobacter</i>                   | -     | -      | -      | -      | -       | -       | -     | -      | -      | -      | 0.02    | 0.02    | -     | -       |
| Gammaproteobacteria-Xanthomonadales-Xanthomonadaceae- <i>Thermomonas</i>                  | -     | -      | 0.01   | -      | -       | -       | -     | -      | 0.03   | 0.05   | 0.06    | 0.16    | -     | -       |
| Gammaproteobacteria-Xanthomonadales-Xanthomonadaceae- <i>Stenotrophomonas</i>             | -     | -      | 0.03   | -      | -       | -       | -     | -      | -      | -      | -       | -       | -     | -       |
| Gammaproteobacteria-Xanthomonadales-Xanthomonadaceae- <i>Pseudoxanthomonas</i>            | 1.20  | 0.38   | 0.50   | 0.35   | 0.17    | 0.71    | 1.31  | 0.81   | 0.62   | 0.71   | 0.31    | 0.42    | 33.53 | 28.30   |
| Gammaproteobacteria-Methylococcales-Methylococcaceae- <i>Methylococcus</i>                | 0.04  | -      | -      | -      | -       | -       | -     | 0.01   | -      | -      | -       | -       | -     | -       |
| Nitrospira-Nitrospira-Nitrospirales-Nitrospiraceae- <i>Nitrospira</i>                     | -     | -      | -      | -      | -       | 0.02    | -     | -      | -      | 0.08   | 0.07    | 0.05    | 0.01  | -       |
| Gemmatimonadetes-Gemmatimonadetes-Gemmatimonadales-Gemmatimonadaceae- <i>Gemmatimonas</i> | 0.07  | -      | -      | -      | -       | -       | 0.32  | 0.35   | 0.40   | 0.39   | 0.37    | 0.12    | -     | -       |

| Phylogenetic group                                                                               | Mo(0) | Mo(28) | Mo(56) | Mo(84) | Mo(112) | Mo(140) | Wk(0) | Wk(28) | Wk(56) | Wk(84) | Wk(112) | Wk(140) | Fd(0) | Fd(140) |
|--------------------------------------------------------------------------------------------------|-------|--------|--------|--------|---------|---------|-------|--------|--------|--------|---------|---------|-------|---------|
| Acidobacteria-                                                                                   |       |        |        |        |         |         |       |        |        |        |         |         |       |         |
| Acidobacteria-unclassified                                                                       | -     | 0.02   | -      | -      | -       | 0.02    | 0.06  | 0.16   | 0.25   | 0.25   | 0.21    | 0.25    | -     | 0.01    |
| Acidobacteria-Group 4                                                                            | 0.18  | 0.57   | 3.28   | 6.92   | 0.35    | 0.48    | 0.12  | 1.40   | 8.18   | 13.01  | 23.04   | 25.44   | 0.01  | 0.06    |
| Acidobacteria-Group 3                                                                            | 0.58  | 0.46   | 0.49   | 0.19   | 0.23    | 0.43    | 0.46  | 0.74   | 0.67   | 0.46   | 0.49    | 0.57    | 0.01  | 0.01    |
| Acidobacteria-Group 2                                                                            | -     | -      | -      | -      | -       | -       | -     | -      | -      | -      | -       | -       | 0.01  | 0.01    |
| Acidobacteria-Group 1                                                                            | -     | -      | -      | 0.04   | 0.02    | 0.02    | 0.04  | 0.02   | 0.04   | 0.01   | 0.07    | 0.03    | 0.31  | 0.06    |
| Acidobacteria-Group 7                                                                            | -     | -      | -      | -      | -       | -       | -     | -      | 0.01   | 0.03   | 0.09    | 0.16    | -     | -       |
| Acidobacteria-Group 6                                                                            | 0.27  | 0.14   | 0.11   | 0.07   | -       | 0.09    | 0.23  | 0.51   | 0.53   | 0.50   | 0.44    | 0.41    | 0.02  | 0.02    |
| Acidobacteria-Group 15                                                                           | -     | -      | -      | -      | -       | -       | -     | -      | -      | -      | -       | -       | -     | 0.01    |
| Acidobacteria-Group 16                                                                           | 0.02  | 0.03   | 0.01   | -      | -       | 0.04    | 0.02  | 0.02   | 0.01   | 0.03   | -       | -       | 0.02  | -       |
| Deinococcus-Thermus-Deinococci-Deinococcales-Deinococcaceae- <i>Deinococcus</i>                  | -     | -      | -      | -      | -       | -       | -     | -      | -      | -      | -       | -       | -     | 0.01    |
| Verrucomicrobia-                                                                                 |       |        |        |        |         |         |       |        |        |        |         |         |       |         |
| Opiritae-Opiritales-Opiritaceae- <i>Opiritus</i>                                                 | -     | 0.03   | 0.09   | 0.13   | 0.03    | 0.06    | -     | -      | 0.01   | -      | 0.01    | -       | -     | -       |
| Verrucomicrobiae-Verrucomicrobiales-Verrucomicrobiaceae- <i>Luteobacter</i>                      | -     | 0.11   | 0.01   | -      | -       | -       | -     | -      | 0.01   | -      | -       | -       | -     | -       |
| Verrucomicrobiae-Verrucomicrobiales-Verrucomicrobiaceae- <i>Verrucomicrobium</i>                 | 0.02  | -      | -      | -      | -       | -       | -     | -      | 0.03   | -      | 0.01    | -       | -     | -       |
| Subdivision 3-Subdivision 3_genera_incertae_sedis                                                | -     | -      | -      | -      | -       | -       | -     | -      | 0.02   | -      | -       | -       | -     | -       |
| Plantomycetes-                                                                                   |       |        |        |        |         |         |       |        |        |        |         |         |       |         |
| Planctomycetacia-Planctomycetacia-Planctomycetales-Planctomycetaceae-unclassified                | -     | -      | -      | -      | -       | -       | -     | 0.02   | -      | 0.01   | 0.01    | -       | -     | -       |
| Planctomycetacia-Planctomycetacia-Planctomycetales-Planctomycetaceae- <i>Singulisphaera</i>      | -     | -      | -      | -      | -       | -       | 0.04  | -      | -      | -      | -       | -       | -     | -       |
| Chloroflexia-Thermomicrobia-unclassified                                                         | -     | -      | -      | -      | -       | -       | -     | -      | -      | -      | -       | -       | 0.01  | -       |
| Bacteria_incertae_sedis-Ktedonobacteria-Ktedonobacteria-Ktedonobacteraceae- <i>Ktedonobacter</i> | -     | -      | 0.01   | -      | -       | -       | -     | -      | -      | -      | -       | -       | 0.03  | -       |

<sup>a</sup> Abbreviations as defined in Table 1.

<sup>b</sup> As user-defined phylogenetic groups (e.g., Pyrene Group 2, Anthracene Group 1) are not recognized by RDP-II, they do not appear in this table.
