# Supplementary material
Source: PubMed Central journal article supplement (PMC3227512)

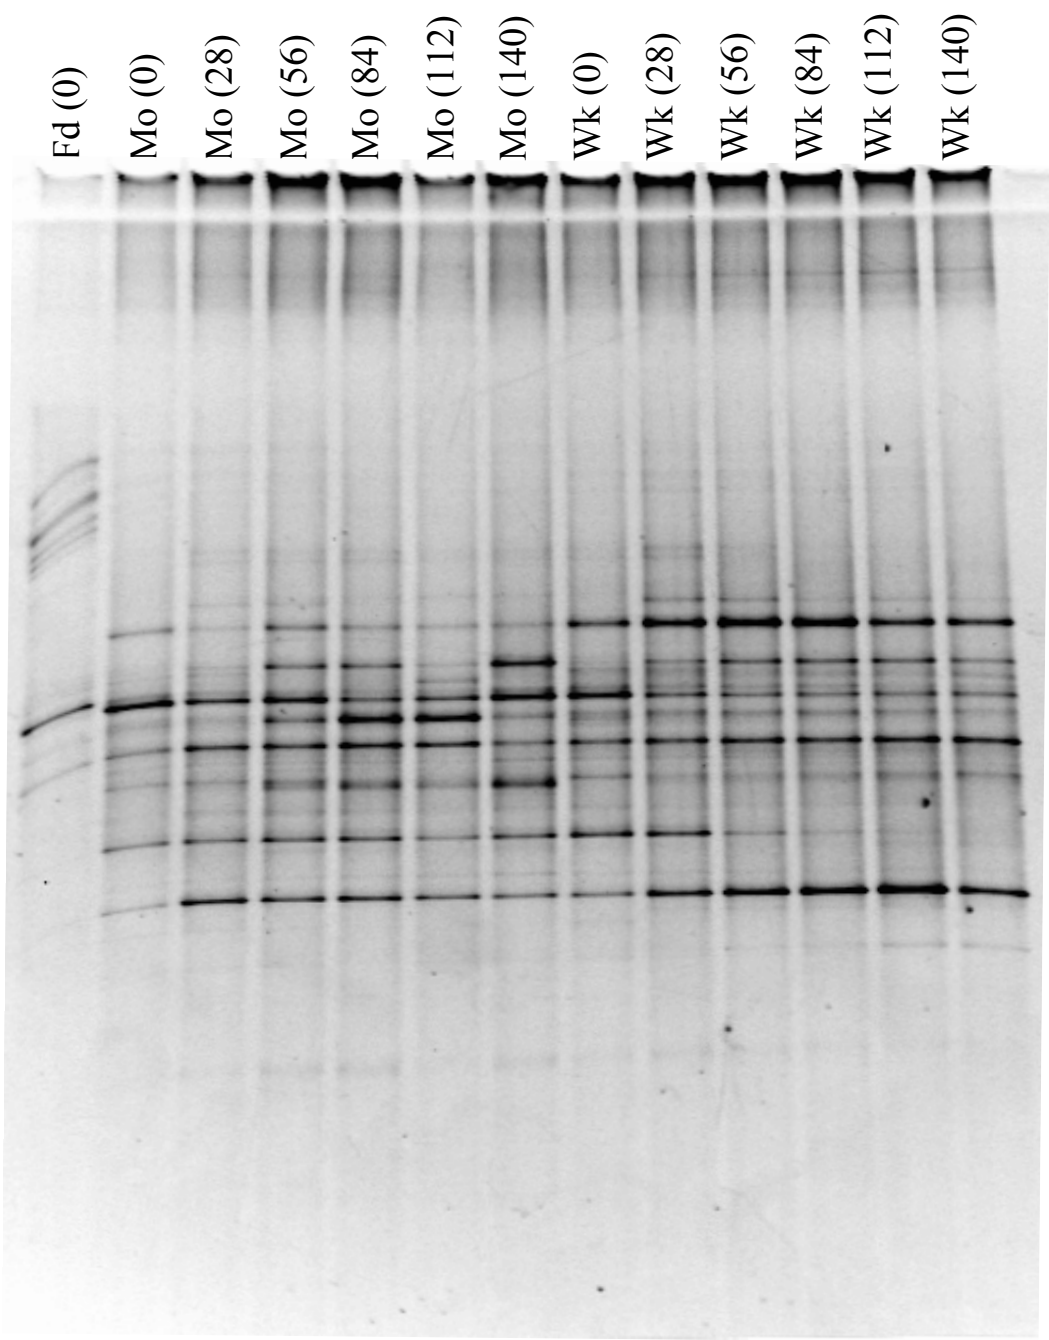

Supplement: NIHMS289957-supplement-2.pdf [file NIHMS289957-supplement-2.pdf]
